# Supplementary material for: Five-step unilateral biportal endoscopic surgery for central lumbar canal stenosis: "Z" technique nuance
Source: PubMed Central journal article supplement (PMC11013373; doi:10.3171/2024.1.focvid23182), 2024-04-01
Supplement: SupplementaryFigs1-3_FOCVID23-182.pdf [file SupplementaryFigs1-3_FOCVID23-182.pdf]

ONLINE ONLY

## Supplemental material

### Five-step unilateral biportal endoscopic surgery for central lumbar canal stenosis: “Z” technique nuance

Kaen et al.

<https://thejns.org/doi/abs/10.3171/2024.1.FOCVID23182>

**DISCLAIMER** The *Journal of Neurosurgery* acknowledges that the following section is published verbatim as submitted by the authors and did not go through either the *Journal's* peer-review or editing process.

## SURGICAL PLANNING

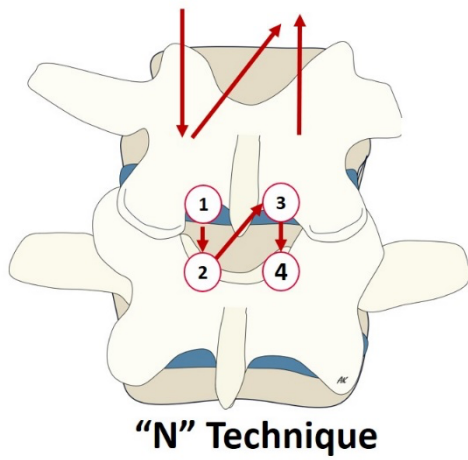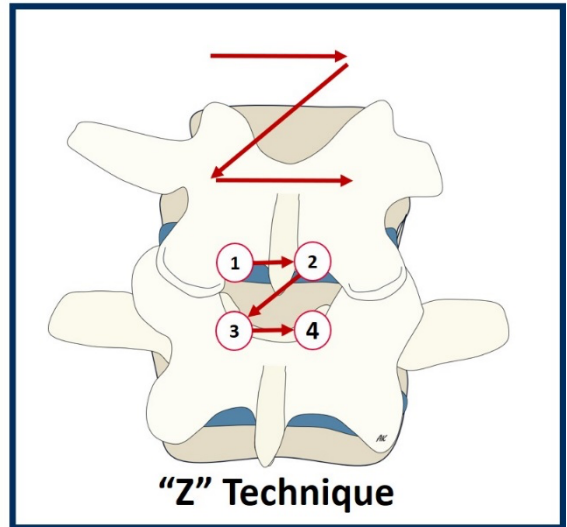

**Supplementary Figure 1.**

In these illustrations we show the sequential steps and the different between the classical "N" technique (right) and the new one "Z" technique (left).

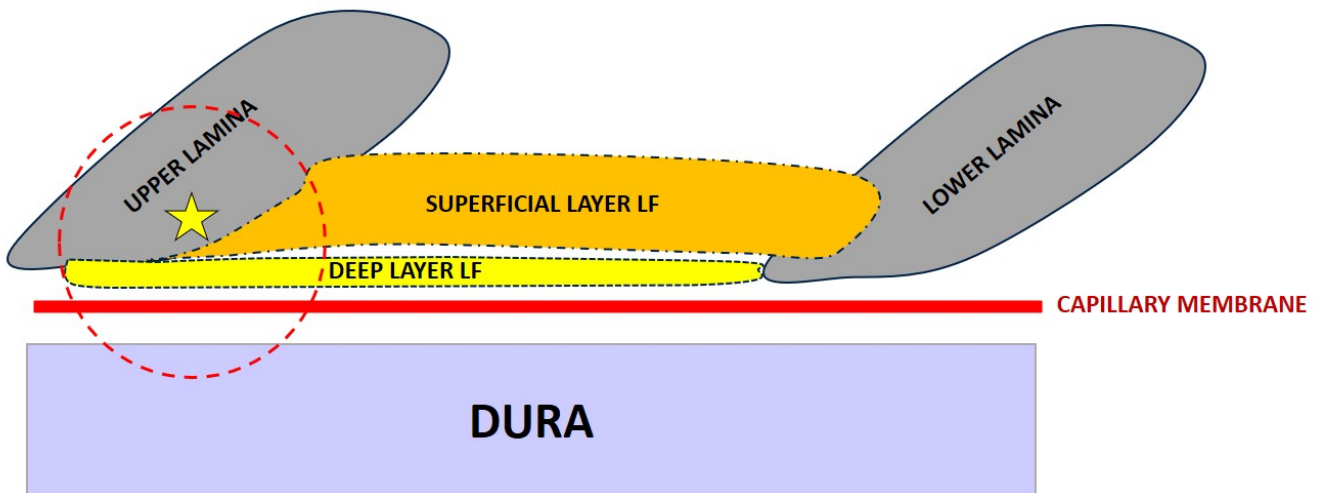

**Supplementary Figure 2.**

Illustrations that show the different insertions of the two layers of the flum ligament.

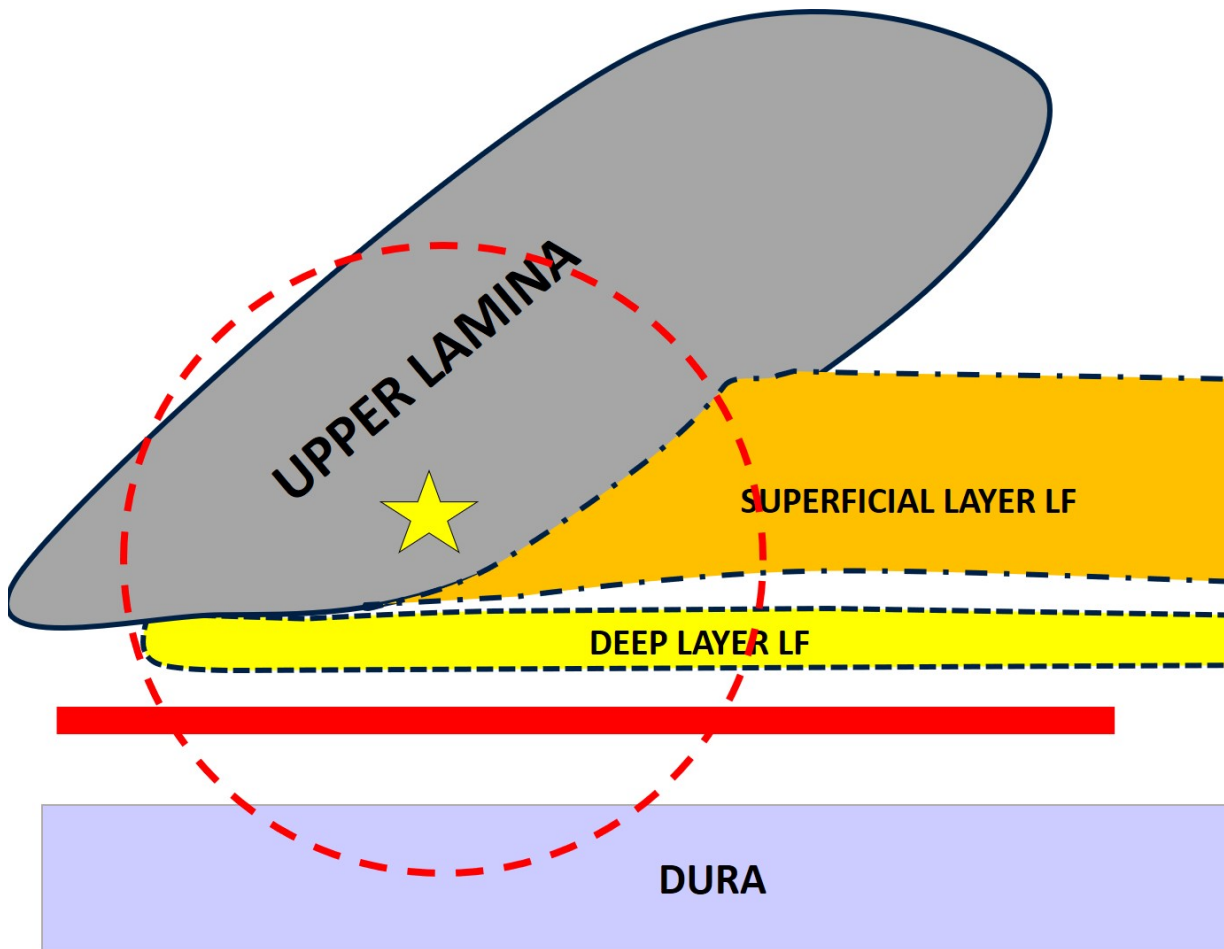

**Supplementary Figure 3.**

Illustrations that show the "inner" spinous lamina point (star), where is easier to dissect the superficial from the deeper layer of flavum ligament.
